# Supplementary material for: Microvolt T-Wave Alternans Is Modulated by Acute Low-Level Tragus Stimulation in Patients With Ischemic Cardiomyopathy and Heart Failure
Source: Frontiers journal article supplement (doi:10.3389/fphys.2021.707724), 2021-07-23
Supplement: Data_Sheet_1.pdf [file Data_Sheet_1.pdf]

# **Microvolt T-wave Alternans is Modulated by Acute Low-Level Tragus Stimulation in Patients with Ischemic Cardiomyopathy and Heart Failure**

**Kanchan Kulkarni, PhD, Stavros Stavrakis, MD, PhD, Khaled Elkholey, MD, Jagmeet P. Singh, MD, PhD, Kimberly A. Parks, DO, Antonis A. Armoundas, PhD**

## **RESULTS**

### ***Effect on heart rate***

Table 1 presents the heart rate during sinus rhythm and with concomitant atrial pacing for each patient during each intervention. Mean, standard deviation and standard error in heart rates for each intervention are also presented. Heart rates during sinus rhythm are significantly lower than during atrial pacing for each intervention.

### ***Effect on T-wave alternans burden***

Table 2 presents the median T-wave alternans (TWA) burden observed in each lead across all patients during sinus rhythm and with concomitant atrial pacing. Mean, standard deviation and standard error in median TWA burden for each intervention are also presented. Acute low-level tragus stimulation (LLTS) increases TWA burden compared to sham during sinus rhythm. This effect is diminished with atrial pacing at faster heart rates.

## Online Supplement

**Table 1. Heart rates during sinus rhythm and atrial pacing (n=19).** Mean heart rate for each patient during each intervention. ‘-’ denotes no response to atrial pacing. Patients with significant premature ventricular contractions, AV nodal dysfunction, ventricular pacing or significant stimulation artifacts were excluded from the analysis. \* denotes statistical significance of  $p < 0.05$  between Sham I interventions, during sinus rhythm and atrial pacing, # denotes statistical significance of  $p < 0.05$  between 5Hz LLTS interventions, during sinus rhythm and atrial pacing, \$ denotes statistical significance of  $p < 0.05$  between Sham II interventions, during sinus rhythm and atrial pacing, ^ denotes statistical significance of  $p < 0.05$  between 20Hz LLTS interventions, during sinus rhythm and atrial pacing, and & denotes statistical significance of  $p < 0.05$  between Sham III interventions, during sinus rhythm and atrial pacing (1-way ANOVA).

| Patient | Sinus Rhythm (bpm) |           |         |            |          | Atrial Pacing (bpm) |           |         |            |          |
|---------|--------------------|-----------|---------|------------|----------|---------------------|-----------|---------|------------|----------|
|         | Sham I             | 5 Hz LLTS | Sham II | 20 Hz LLTS | Sham III | Sham I              | 5 Hz LLTS | Sham II | 20 Hz LLTS | Sham III |
| 3       | 67                 | 66        | 67      | 66         | 65       | -                   | -         | -       | -          | -        |
| 5       | 66                 | 68        | 67      | 67         | 66       | 100                 | 100       | 100     | 100        | 100      |
| 6       | 60                 | 60        | 61      | 62         | 60       | 100                 | 100       | 100     | 100        | 100      |
| 7       | 70                 | 71        | 71      | 70         | 69       | -                   | 90        | 90      | 90         | 90       |
| 9       | 63                 | 62        | 61      | 62         | 62       | 100                 | 100       | 100     | 100        | 100      |
| 10      | 54                 | 53        | 53      | 53         | 52       | 90                  | 90        | 90      | 90         | 90       |
| 12      | 59                 | 58        | 57      | 56         | 58       | 100                 | 100       | 100     | 100        | 100      |
| 13      | 75                 | 76        | 76      | 77         | 77       | 100                 | 100       | 100     | 100        | 100      |
| 14      | 60                 | 60        | 60      | 60         | 60       | 100                 | 100       | 100     | 100        | 100      |
| 17      | 53                 | 51        | 52      | 51         | 50       | 100                 | 100       | 100     | 100        | 100      |
| 18      | 78                 | 78        | 79      | 77         | 78       | 100                 | 100       | 100     | 100        | 99       |
| 19      | 50                 | 50        | 50      | 50         | 50       | 90                  | 90        | 90      | 90         | 90       |
| 20      | 57                 | 57        | 57      | 57         | 57       | 100                 | 100       | 100     | 100        | 100      |
| 21      | 65                 | 64        | 62      | 64         | 63       | 100                 | 100       | 100     | 100        | 100      |
| 22      | 77                 | 77        | 78      | 78         | 79       | 79                  | 80        | 81      | 81         | 82       |
| 23      | 50                 | 50        | 50      | 50         | 50       | 90                  | 90        | 90      | 90         | 90       |
| 24      | 50                 | 50        | 50      | 50         | 50       | -                   | -         | -       | -          | -        |
| 25      | 56                 | 57        | 56      | 56         | 57       | 100                 | 100       | 100     | 100        | 100      |
| 26      | 61                 | 68        | 59      | 62         | 61       | 100                 | 100       | 101     | 100        | 100      |
| Mean    | 61.63*             | 61.89#    | 61.37\$ | 61.47^     | 61.26&   | 96.81*              | 96.47#    | 96.59\$ | 96.53^     | 96.53&   |
| Stdev.  | 8.88               | 9.3       | 9.36    | 9.26       | 9.39     | 6.21                | 6.06      | 5.94    | 5.9        | 5.7      |
| Error   | 2.04               | 2.13      | 2.15    | 2.12       | 2.15     | 1.55                | 1.47      | 1.44    | 1.43       | 1.38     |

# Online Supplement

**Table 2. T-wave alternans (TWA) burden during sinus rhythm and atrial pacing (n=19).** Median TWA burden (%) observed in each lead during each intervention. \*, #, \$, ^ and & denote statistical significance of  $p < 0.05$  between respective pairs of interventions, during sinus rhythm and atrial pacing (1-way ANOVA, Tukey post hoc test).

| Lead     | Sinus Rhythm TWA Burden (%) |           |         |            |          | Atrial Pacing TWA Burden (%) |           |         |            |          |
|----------|-----------------------------|-----------|---------|------------|----------|------------------------------|-----------|---------|------------|----------|
|          | Sham I                      | 5 Hz LLTS | Sham II | 20 Hz LLTS | Sham III | Sham I                       | 5 Hz LLTS | Sham II | 20 Hz LLTS | Sham III |
| Lead I   | 10.77                       | 3.72      | 0       | 2.03       | 0        | 7.41                         | 9.39      | 6.95    | 18.82      | 3.29     |
| Lead II  | 0.51                        | 6.9       | 2.3     | 3.32       | 0        | 14.62                        | 10.65     | 18.24   | 13.38      | 0.5      |
| Lead III | 10.48                       | 3.14*     | 0       | 4.15       | 0*       | 17.74                        | 14.34     | 4.71    | 12.8       | 11.87    |
| aVR      | 0                           | 7.33*     | 0*      | 4.4        | 1.32     | 11.04                        | 8.29      | 8.04    | 11.64      | 0.85     |
| aVL      | 2.22                        | 6.72      | 5.67    | 4.33       | 0        | 4.86\$                       | 11.18     | 7.6     | 21.86\$    | 3.62     |
| aVF      | 0                           | 5.36*     | 0*#     | 7.56#      | 0        | 8.37\$                       | 8.1       | 8.77    | 19.68\$    | 12.84    |
| V1       | 1.11                        | 11.65     | 3.97    | 5.25       | 0        | 1.74                         | 8.51      | 4.73    | 6.95       | 0        |
| V2       | 0                           | 9.53*     | 0.76#   | 14.08#\$   | 0*\$     | 20.54                        | 17.9      | 7.1     | 7.73       | 1.83     |
| V3       | 0.28                        | 9.73      | 9.51    | 7.19\$     | 0.29\$   | 10.42                        | 14.11     | 15.9    | 17         | 13.74    |
| V4       | 2.19                        | 2.87      | 0       | 10.42      | 0        | 4.38                         | 15.64     | 9.79    | 25.2       | 8.72     |
| V5       | 0                           | 9.5       | 10.54   | 6.43       | 1.54     | 8.78                         | 14.36     | 3.8     | 12.45      | 2.71     |
| V6       | 2.92                        | 7.35*     | 4.36    | 4.87\$     | 0*\$     | 18.13                        | 10.7      | 20.61   | 15.88      | 8.75     |
| Mean     | 2.54*\$                     | 6.98*^&   | 3.09^   | 6.17\$#    | 0.26&#   | 10.67                        | 11.93*    | 9.69    | 15.28\$    | 5.73*\$  |
| Stdev.   | 3.91                        | 2.82      | 3.81    | 3.33       | 0.55     | 5.97                         | 3.24      | 5.54    | 5.51       | 5.13     |
| Error    | 1.13                        | 0.81      | 1.1     | 0.96       | 0.16     | 1.72                         | 0.94      | 1.6     | 1.59       | 1.48     |
